# Supplementary material
Source: MDPI journal article supplement (https://www.mdpi.com/2076-3417/14/9/3927)
Supplement: s1 [file s1]

## **Supplementary Materials**

### **Evaluation of Antimutagenic and Antioxidant Properties in *Fomes fomentarius* L.: Potential Development as Functional Food**

Chang Gyun Park<sup>1</sup> and Heung Bin Lim<sup>2\*</sup>

<sup>1</sup> *Division of Experimental Neurosurgery, Department of Neurosurgery, Heidelberg University Hospital, Heidelberg, Germany*

<sup>2</sup> *Department of Industrial Plant Science & Technology, Chungbuk National University  
Cheongju, Korea*

---

#### **\*Corresponding Authors:**

Heung Bin Lim; E-mail address: heungbin@chungbuk.ac.kr;

Tel: +82-43-261-2521; Fax: +82-43-276-1030

**Supplementary Table S1.** The mutagenicity activity of the FFL extracts in TA98 and TA100 strains

| Ethanol percentage (%) | Treatment (µg/plate) | TA98     |          | TA100    |          |
|------------------------|----------------------|----------|----------|----------|----------|
|                        |                      | -S9      | +S9      | -S9      | +S9      |
| Negative control       |                      | 22 ± 4   | 25 ± 3   | 121 ± 11 | 118 ± 16 |
| Positive control       |                      | 735 ± 68 | 531 ± 31 | 792 ± 28 | 837 ± 15 |
| 0                      | 200                  | 27 ± 3   | 23 ± 4   | 116 ± 10 | 123 ± 11 |
|                        | 500                  | 19 ± 2   | 26 ± 8   | 123 ± 11 | 138 ± 28 |
|                        | 1000                 | 29 ± 4   | 25 ± 3   | 120 ± 12 | 120 ± 8  |
|                        | 2500                 | 26 ± 7   | 23 ± 3   | 112 ± 11 | 128 ± 7  |
|                        | 5000                 | 22 ± 4   | 31 ± 12  | 132 ± 15 | 135 ± 8  |
| 30                     | 200                  | 21 ± 3   | 26 ± 1   | 131 ± 3  | 122 ± 17 |
|                        | 500                  | 24 ± 3   | 26 ± 4   | 124 ± 5  | 132 ± 20 |
|                        | 1000                 | 22 ± 3   | 29 ± 3   | 128 ± 6  | 129 ± 27 |
|                        | 2500                 | 24 ± 3   | 23 ± 4   | 131 ± 2  | 129 ± 15 |
|                        | 5000                 | 22 ± 2   | 29 ± 8   | 135 ± 3  | 115 ± 7  |
| 50                     | 200                  | 25 ± 4   | 22 ± 2   | 120 ± 10 | 120 ± 13 |
|                        | 500                  | 24 ± 3   | 25 ± 1   | 133 ± 5  | 121 ± 13 |
|                        | 1000                 | 21 ± 4   | 23 ± 1   | 122 ± 3  | 131 ± 5  |
|                        | 2500                 | 23 ± 3   | 23 ± 2   | 124 ± 6  | 111 ± 5  |
|                        | 5000                 | 23 ± 1   | 28 ± 4   | 119 ± 14 | 135 ± 5  |
| 70                     | 200                  | 28 ± 5   | 26 ± 4   | 134 ± 12 | 115 ± 14 |
|                        | 500                  | 22 ± 3   | 29 ± 10  | 147 ± 20 | 124 ± 17 |
|                        | 1000                 | 23 ± 3   | 27 ± 4   | 123 ± 7  | 133 ± 13 |
|                        | 2500                 | 25 ± 7   | 26 ± 7   | 125 ± 6  | 117 ± 14 |
|                        | 5000                 | 27 ± 4   | 30 ± 13  | 124 ± 5  | 118 ± 10 |
| 100                    | 200                  | 29 ± 2   | 30 ± 6   | 127 ± 30 | 122 ± 12 |
|                        | 500                  | 21 ± 2   | 26 ± 2   | 118 ± 15 | 119 ± 9  |
|                        | 1000                 | 23 ± 2   | 24 ± 4   | 127 ± 4  | 125 ± 9  |
|                        | 2500                 | 24 ± 3   | 32 ± 3   | 118 ± 15 | 129 ± 7  |
|                        | 5000                 | 28 ± 3   | 26 ± 6   | 120 ± 12 | 123 ± 11 |

<sup>1</sup> The number of spontaneous revertant colonies (means ± SD) determined with the addition of the samples or only the vehicle (DMSO).

<sup>2</sup> Mean number of revertants induced 2-AA (0.5 µg/plate, with metabolic activation), 4-NQO (1 µg/plate, without metabolic activation in TA 98) and SA (1 µg/plate, without metabolic activation in TA 100).
